# Supplementary material for: The Ubiquitin-Proteasome System Facilitates Membrane Fusion and Uncoating during Coronavirus Entry
Source: MDPI journal article supplement (doi:10.3390/v15102001), 2023-09-26
Supplement: s1 [file s1]

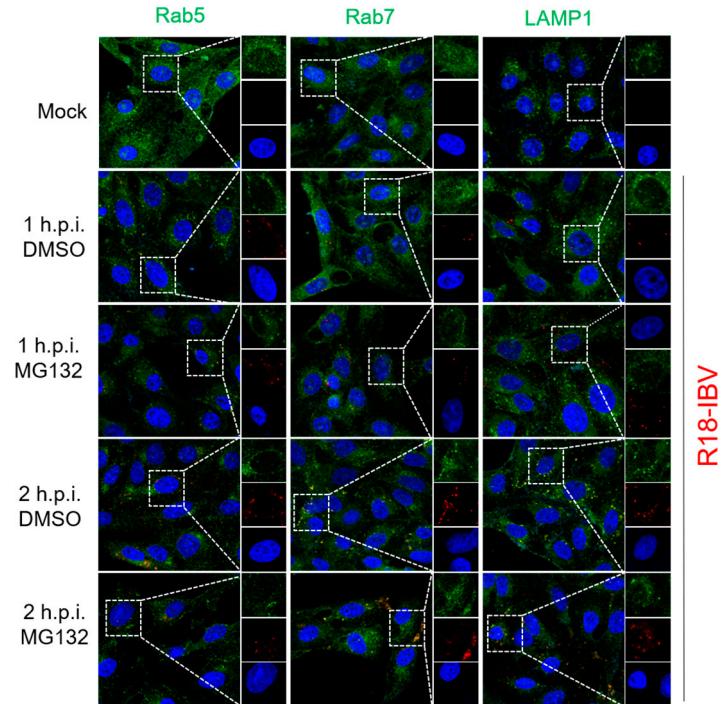

**Supplementary Figure S1.** Vero cells were infected with 5 MOI of R18-labeled IBV and incubated with DMSO or MG132. Cells were subjected to immunofluorescence with anti-Rab5, anti-Rab7, or anti-LAMP1 antibody at 1 or 2 h.p.i., and nuclei were stained with DAPI. The signals were observed under LSM880 confocal laser-scanning microscope (Zeiss). Red signal represents R18-IBV; green signals represent early endosomes (Rab5), later endosomes (Rab7), and lysosomes (LAMP1); blue signals represent nuclei.
